# Supplementary material for: Oxygen vacancy-induced efficient hydrogen spillover in Ni17W3/WO3−x/MoO3−x for a superior pH-universal hydrogen evolution reaction
Source: Royal Society of Chemistry journal article supplement (doi:10.1039/d4ta00729h), 2024-01-01
Supplement: d4ta00729h1.pdf [file d4ta00729h1.pdf]

## Supporting information for

# Oxygen Vacancy Induced Efficient Hydrogen Spillover of Ni<sub>17</sub>W<sub>3</sub>/WO<sub>3-x</sub>/MoO<sub>3-x</sub> for Superior pH-Universal Hydrogen Evolution Reaction

Yiqing Sun<sup>a,b</sup>, Yiwei Bao<sup>a,b</sup>, Di Yin<sup>c</sup>, Xiuming Bu<sup>b\*</sup>, Yuxuan Zhang<sup>c</sup>, Kaihang Yue<sup>b</sup>,  
Xiaoshuang Qi<sup>b</sup>, Ziyang Cai<sup>b</sup>, Yongqiang Li<sup>d</sup>, Xiulan Hu<sup>a\*</sup>, Johnny C. Ho<sup>c,e\*</sup>, Xianying  
Wang<sup>b\*</sup>

<sup>a</sup> College of Materials Science and Engineering, Nanjing Tech University, Puzhu South  
Road No.30, 211816, Nanjing, Jiangsu, China

<sup>b</sup> CAS Key Laboratory of Materials for Energy Conversion, Shanghai Institute of  
Ceramics, Chinese Academy of Sciences, Shanghai 200050, P. R. China

<sup>c</sup> Department of Materials Science and Engineering City University of Hong Kong  
Kowloon, Hong Kong SAR 999077, P. R. China

<sup>d</sup> Joint Laboratory of Graphene Materials and Applications, Shanghai Institute of  
Microsystem and Information Technology, Chinese Academy of Sciences, Shanghai  
200050, P. R. China

<sup>e</sup> Institute for Materials Chemistry and Engineering, Kyushu University, Fukuoka 816–  
8580, Japan

\*Corresponding author. E-mail: [buxiuming@mail.sic.ac.cn](mailto:buxiuming@mail.sic.ac.cn) (Xiuming Bu);  
[whoxiulan@163.com](mailto:whoxiulan@163.com) (Xiulan Hu); [johnnyho@cityu.edu.hk](mailto:johnnyho@cityu.edu.hk) (Johnny C. Ho);  
[wangxianying@mail.sic.ac.cn](mailto:wangxianying@mail.sic.ac.cn) (Xianying Wang)

## Supplementary Figures and Tables

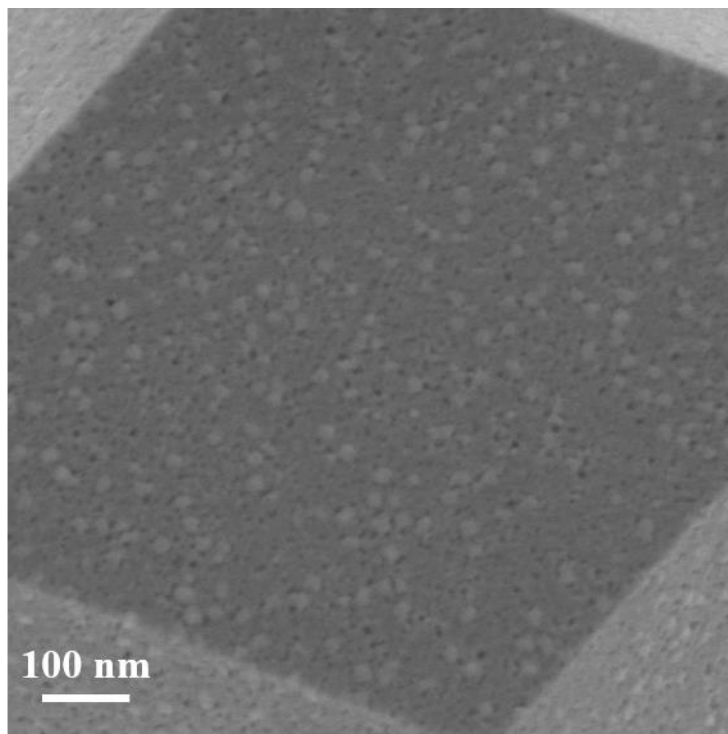

**Figure S1.** High-magnification SEM image of the NWP.

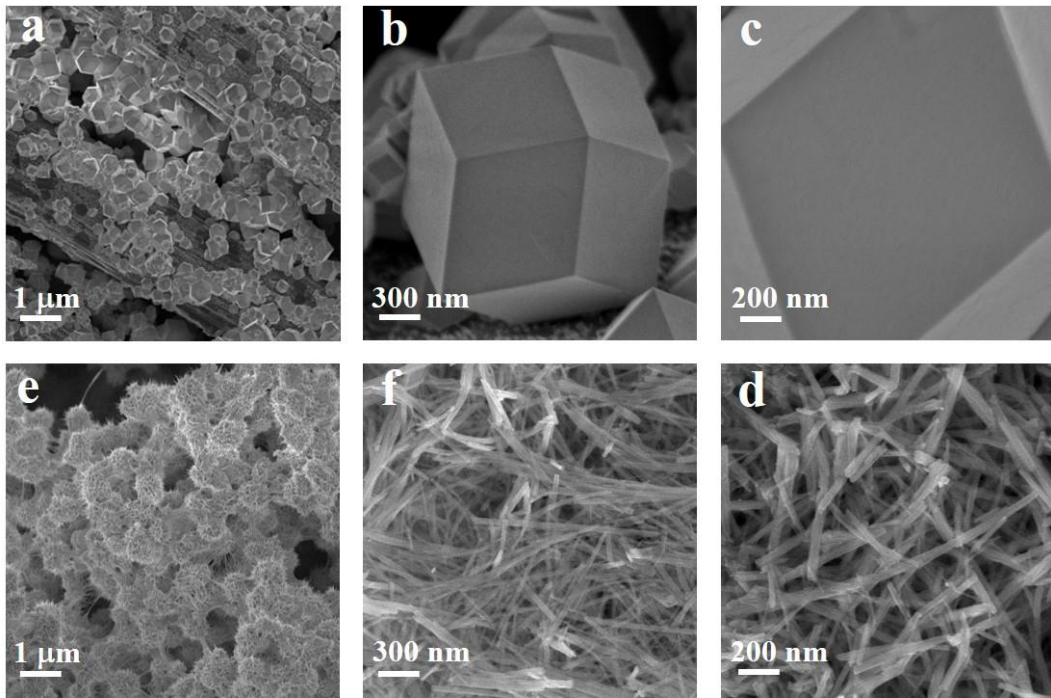

**Figure S2.** Low- and high-magnification SEM images of (a-c)  $\text{Ni}_4\text{W}_6\text{O}_{21}$ , (e-d)  $\text{Mo-Ni}_4\text{W}_6\text{O}_{21}$ .

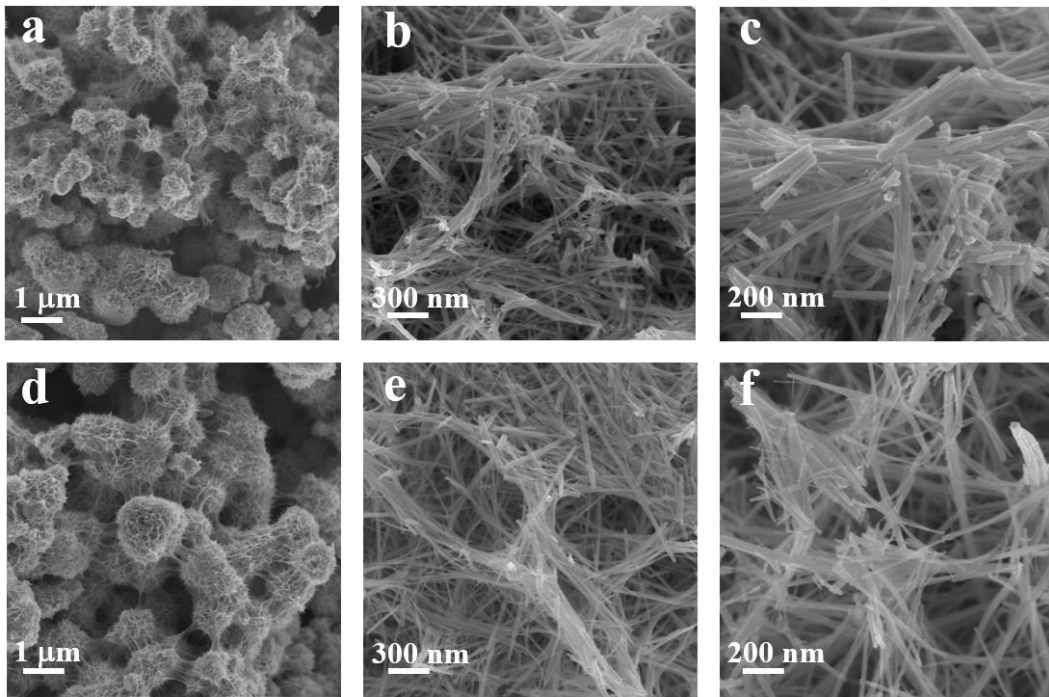

**Figure S3.** Low- and high-magnification SEM images of (a-c)  $\text{NiW}_1\text{M}_{0.5}\text{R}$ , (e-d)  $\text{NiW}_1\text{M}_{1.5}\text{R}$ .

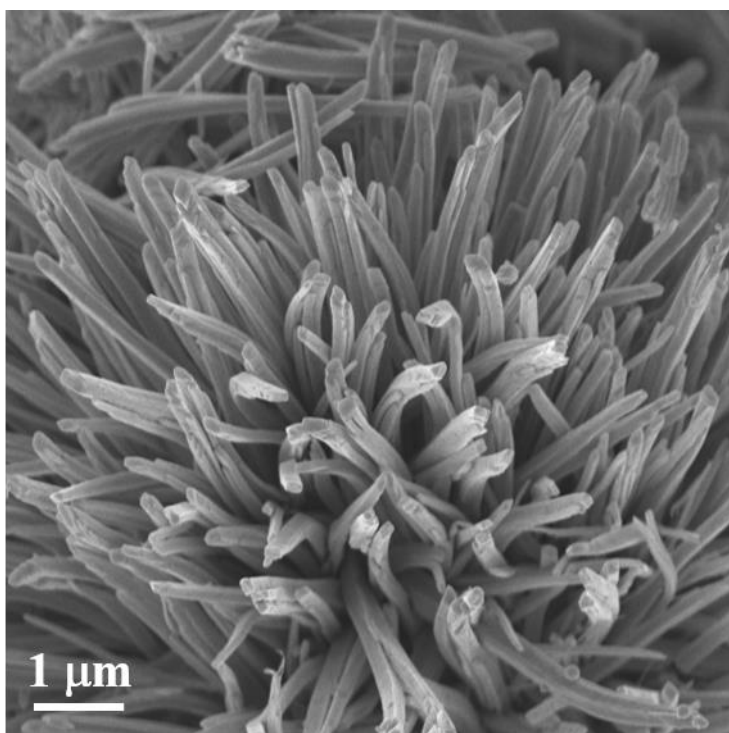

**Figure S4.** SEM images of the NMR.

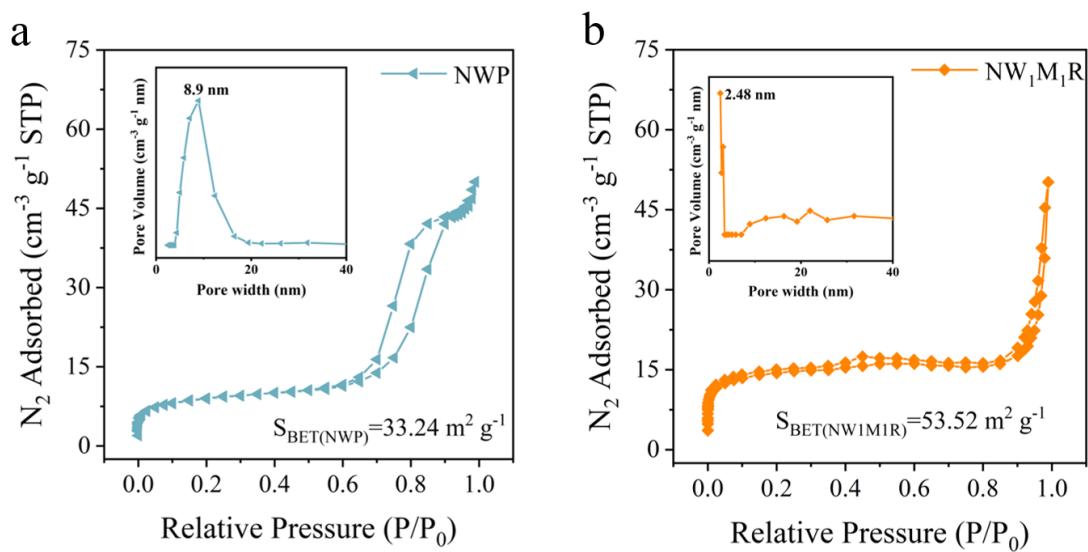

**Figure S5.** Argon adsorption and desorption isotherms of NWP (a) and  $NW_1M_1R$  (b), the inset shows the corresponding pore size distribution curve.

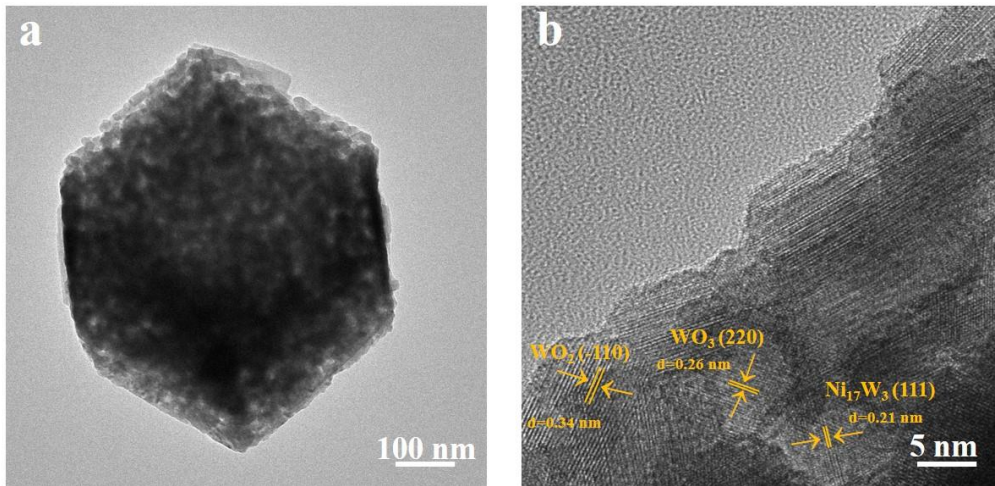

**Figure S6.** (a) TEM and (b) HRTEM images of NWP.

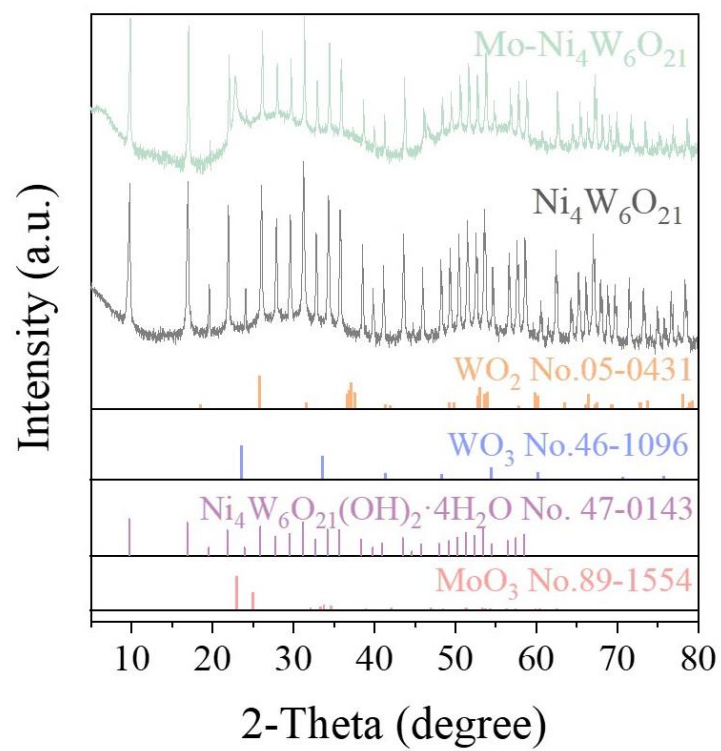

**Figure S7.** XRD patterns of the Mo-Ni<sub>4</sub>W<sub>6</sub>O<sub>21</sub> and Ni<sub>4</sub>W<sub>6</sub>O<sub>21</sub>.



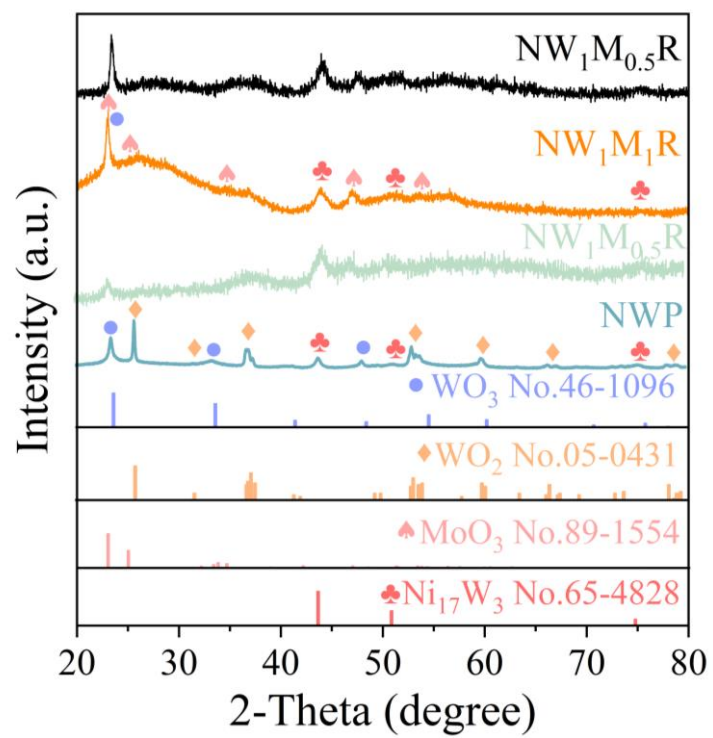

**Figure S8.** XRD patterns of the  $NiW_1M_{0.5}R$ ,  $NW_1M_1R$ ,  $NiW_1M_{1.5}R$  and NWP.

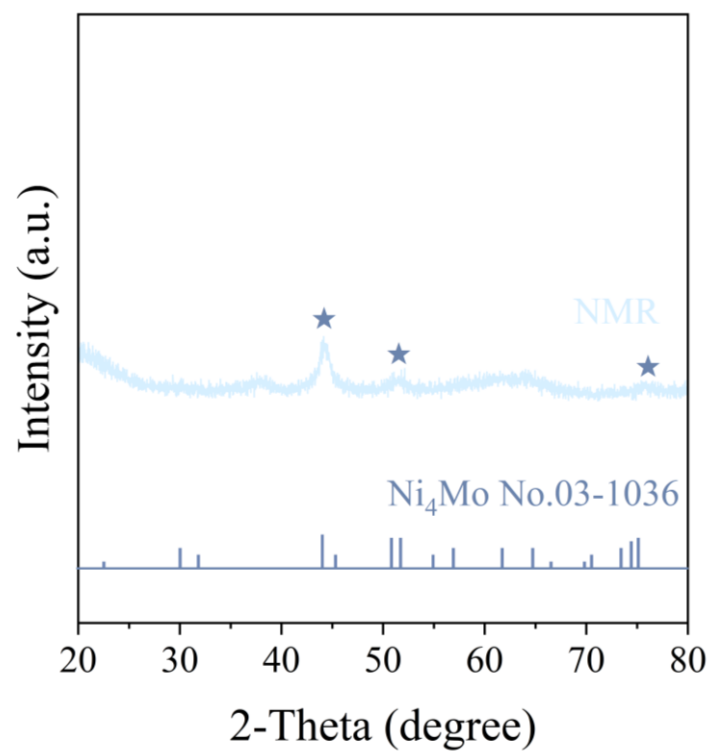

**Figure S9.** XRD patterns of the NMR.

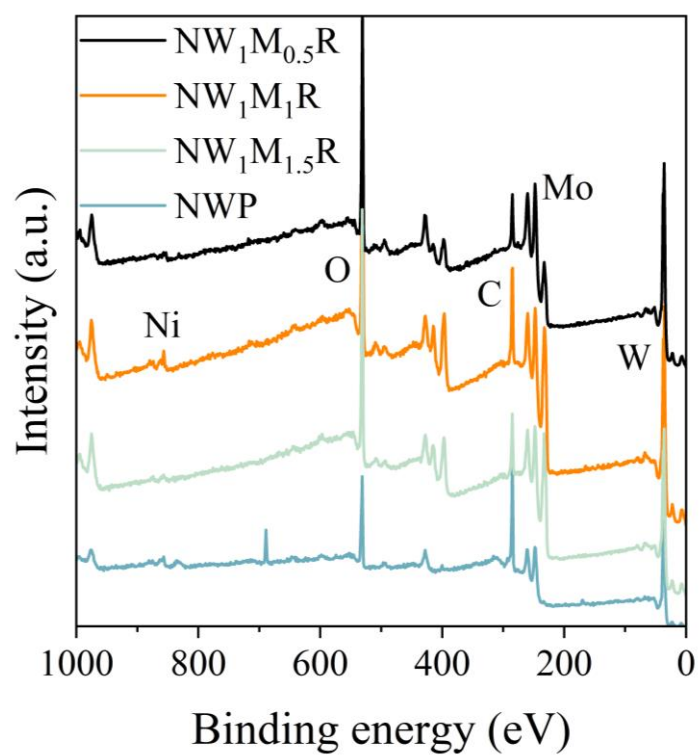

**Figure S10.** Full XPS spectrum of  $NW_1M_{0.5}R$ ,  $NW_1M_1R$ ,  $NW_1M_{1.5}R$ , and NWP.

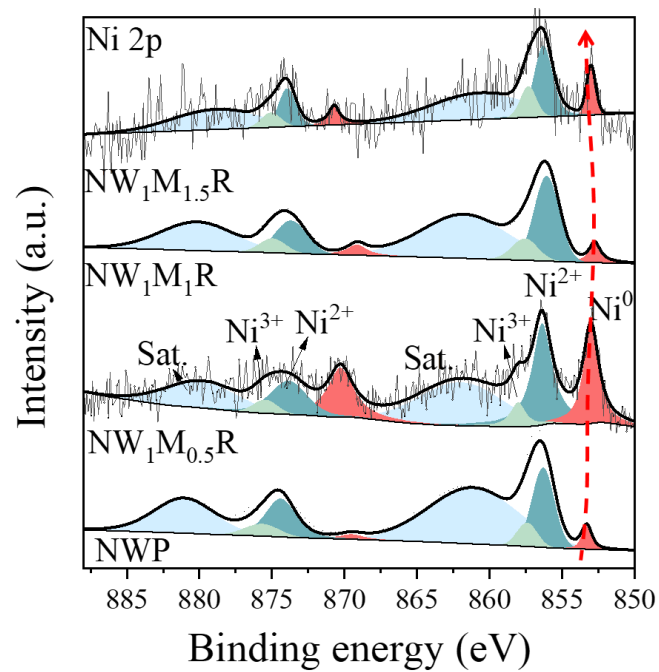

**Figure 11.** High-resolution XPS signals of Ni 2p for NW<sub>1</sub>M<sub>0.5</sub>R, NW<sub>1</sub>M<sub>1.5</sub>R, NW<sub>1</sub>M<sub>1</sub>R and NWP.

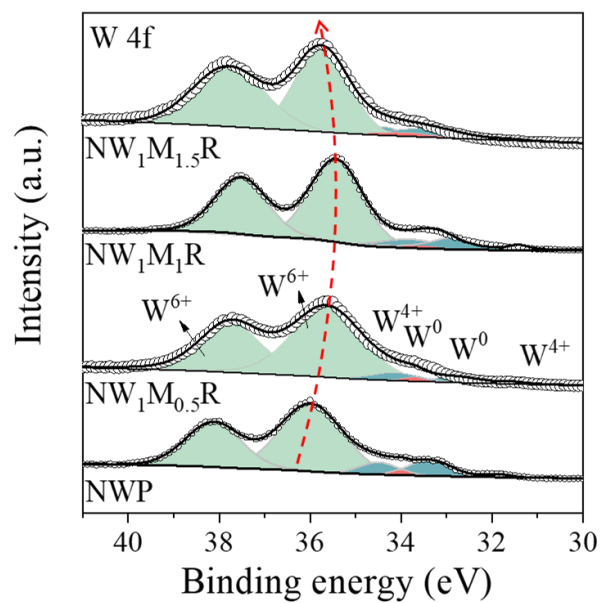

**Figure S12.** High-resolution XPS signals of W 4f for NW<sub>1</sub>M<sub>0.5</sub>R, NW<sub>1</sub>M<sub>1.5</sub>R, NW<sub>1</sub>M<sub>1</sub>R and NWP.

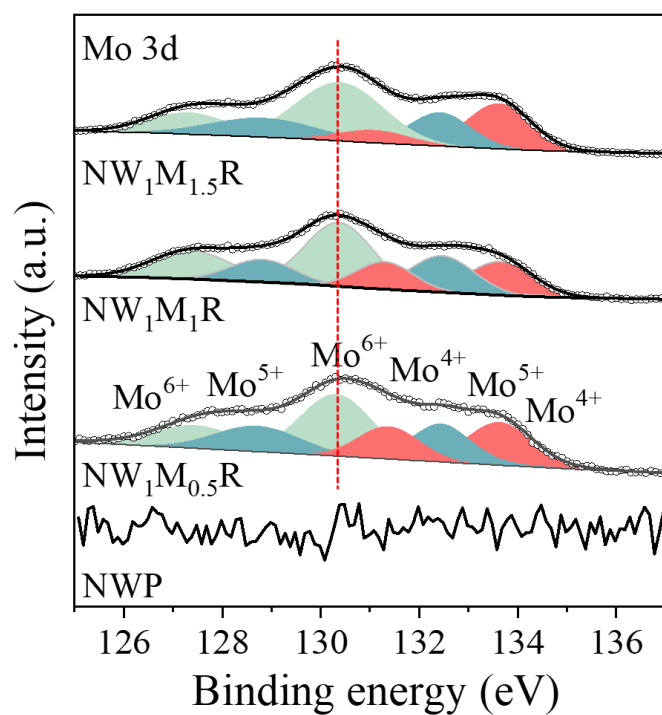

**Figure S13.** High-resolution XPS signals of Mo 3d for NW<sub>1</sub>M<sub>0.5</sub>R, NW<sub>1</sub>M<sub>1.5</sub>R, NW<sub>1</sub>M<sub>1</sub>R and NWP.

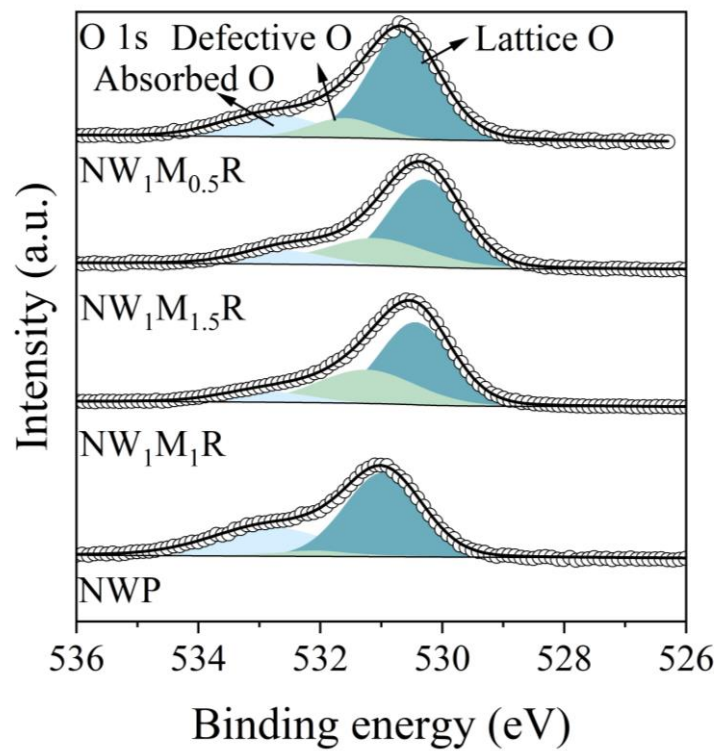

**Figure S14.** High-resolution XPS signals of O 1s for  $NW_1M_{0.5}R$ ,  $NW_1M_{1.5}R$ ,  $NW_1M_1R$ , and NWP.

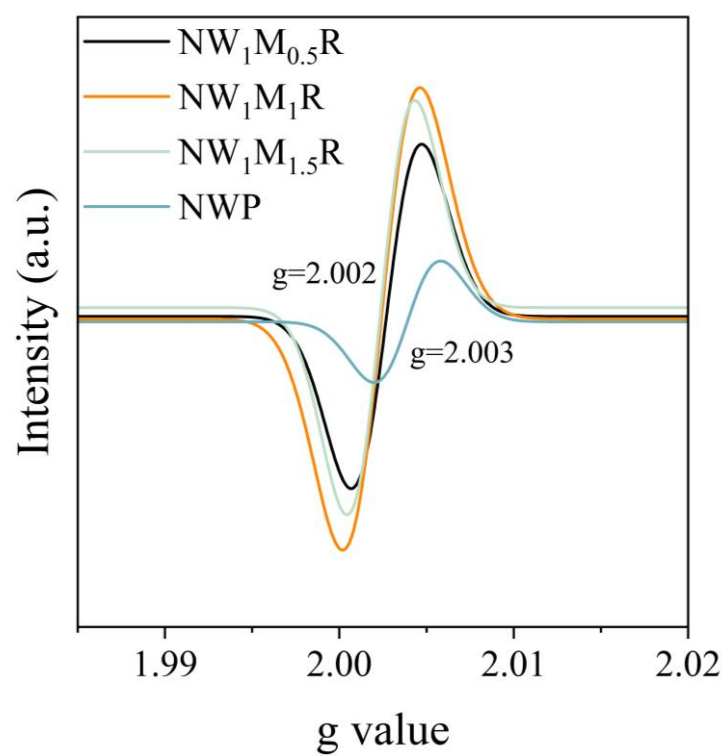

**Figure S15.** EPR spectra of  $NW_1M_{0.5}R$ ,  $NW_1M_1R$ ,  $NW_1M_{1.5}R$  and NWP.



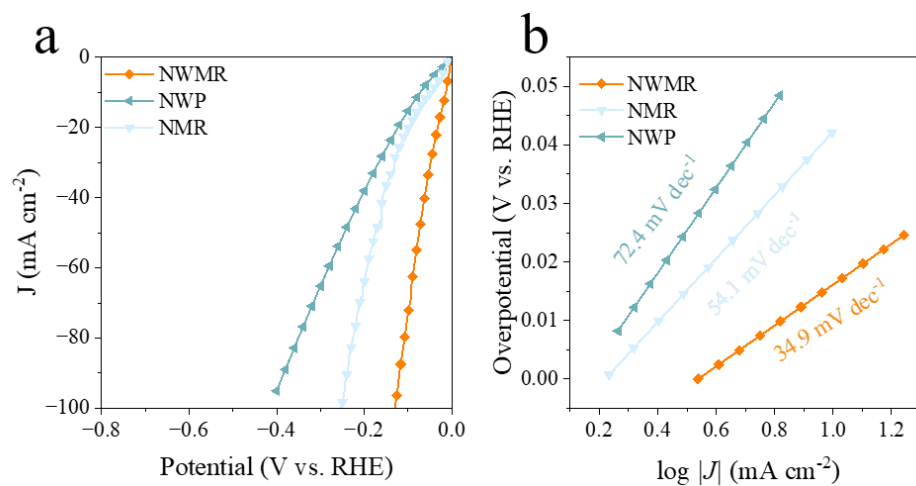

**Figure S16.** (a) LSV curves of  $\text{NW}_1\text{M}_1\text{R}$ , NMR, and NWP and (b) Tafel slope of different electrodes.

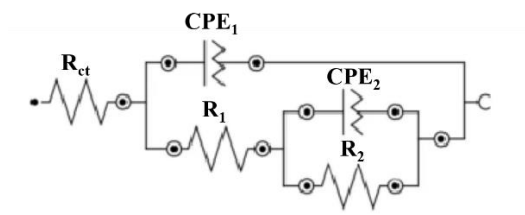

**Figure S17.** Equivalent circuit diagram of  $NW_1M_{0.5}R$ ,  $NW_1M_1R$ ,  $NW_1M_{1.5}R$  and  $NWP$ .

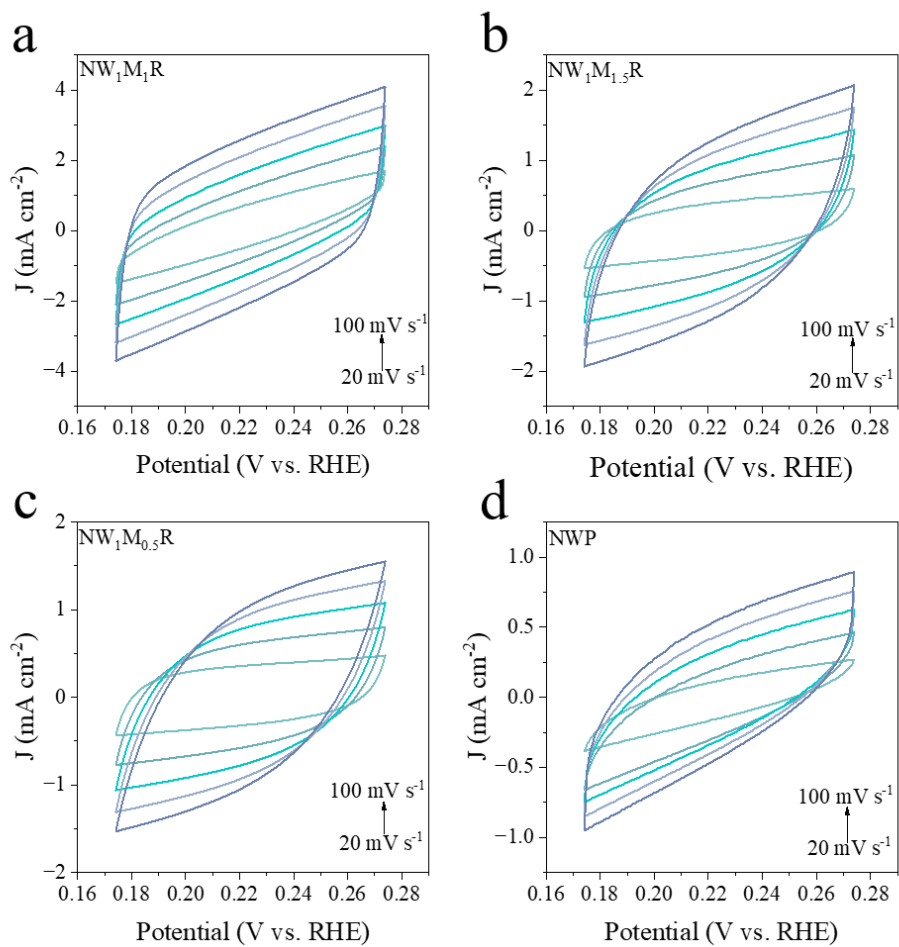

**Figure S18.** CV curves at different scan rates ranging from 20 mV s<sup>-1</sup> to 100 mV s<sup>-1</sup> (a) NW<sub>1</sub>M<sub>1</sub>R, (b) NW<sub>1</sub>M<sub>1.5</sub>R, (c) NW<sub>1</sub>M<sub>0.5</sub>R, and (d) NWP. The potential scanning rates are from 0.173 V to 0.273 V vs. RHE with an interval of 20 mV s<sup>-1</sup>.

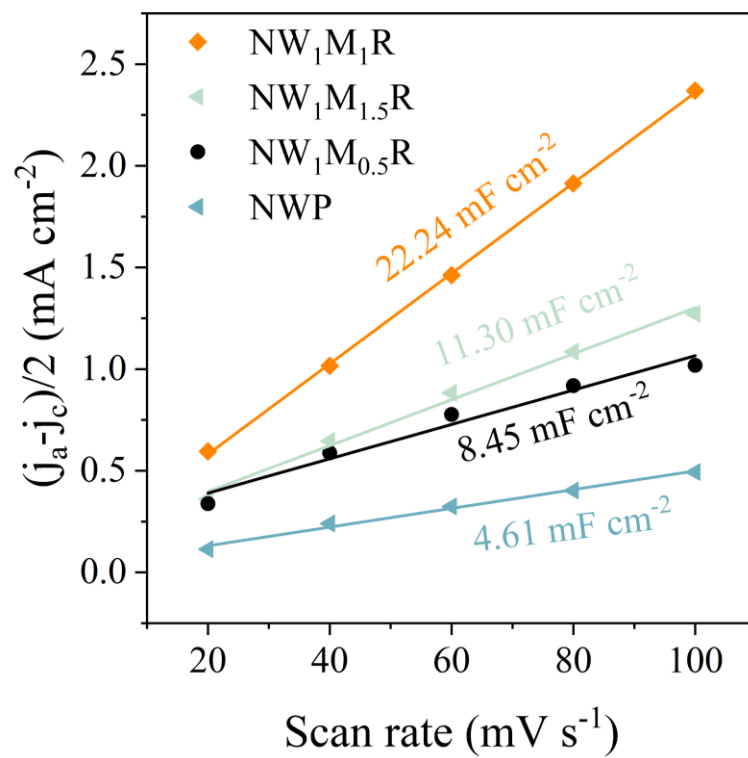

**Figure S19.**  $C_{dl}$  of  $NW_1M_1R$ ,  $NW_1M_{1.5}R$ ,  $NW_1M_{0.5}R$  and NWP.

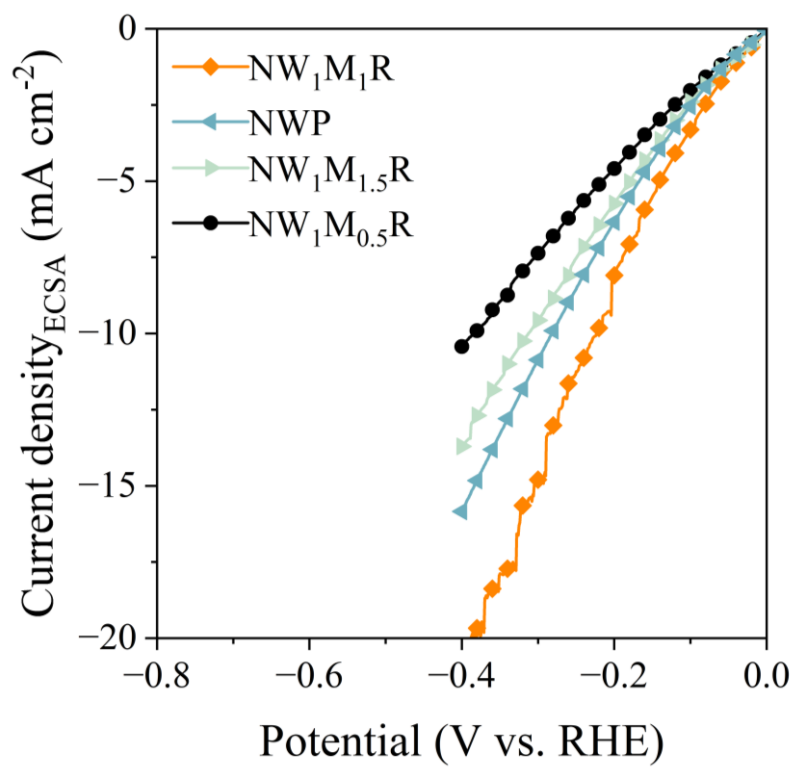

**Figure S20.** ECSA-normalized LSV of the NW<sub>1</sub>M<sub>1</sub>R, NW<sub>1</sub>M<sub>1.5</sub>R, NW<sub>1</sub>M<sub>0.5</sub>R, and NWP.

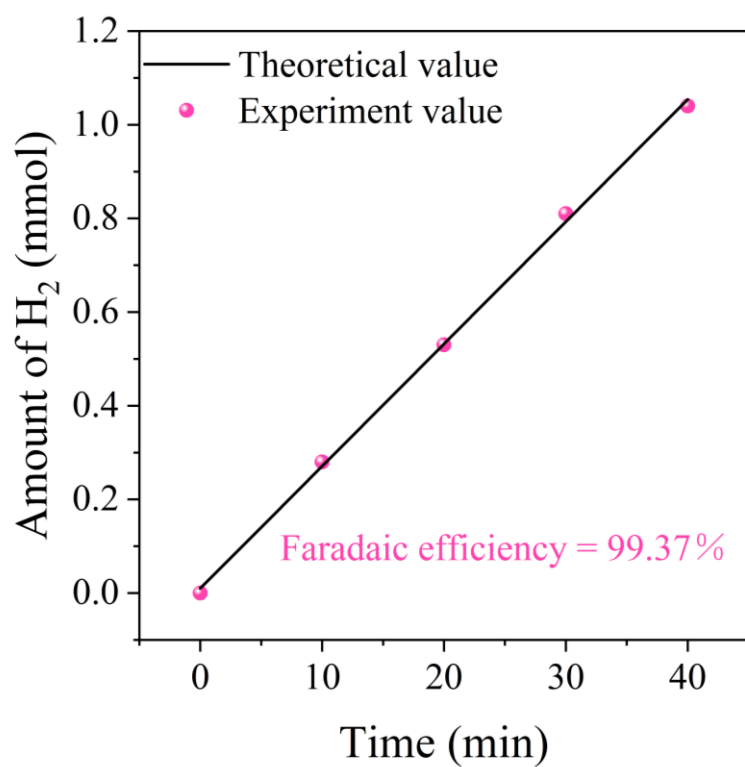

**Figure S21.** Faradic efficiency measurements.

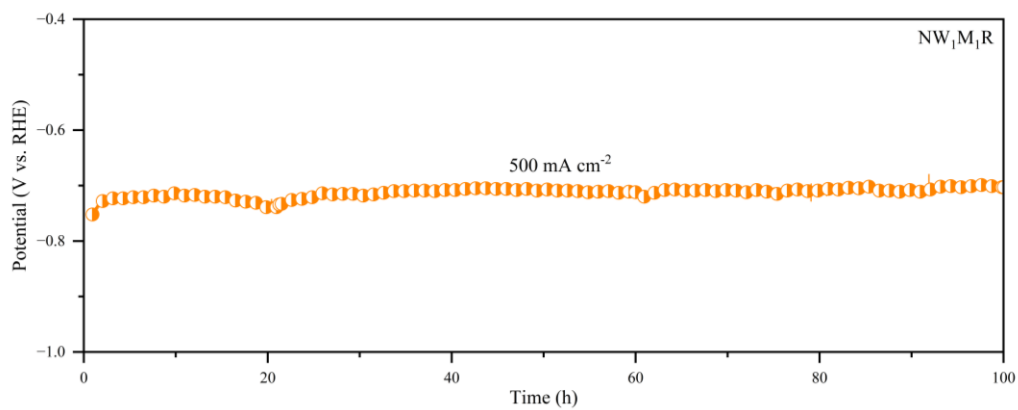

**Figure S22.** Chronopotentiometry stability tests of the NW<sub>1</sub>M<sub>1</sub>R electrodes under the high current density of 500 mA cm<sup>-2</sup> (without iR correction).

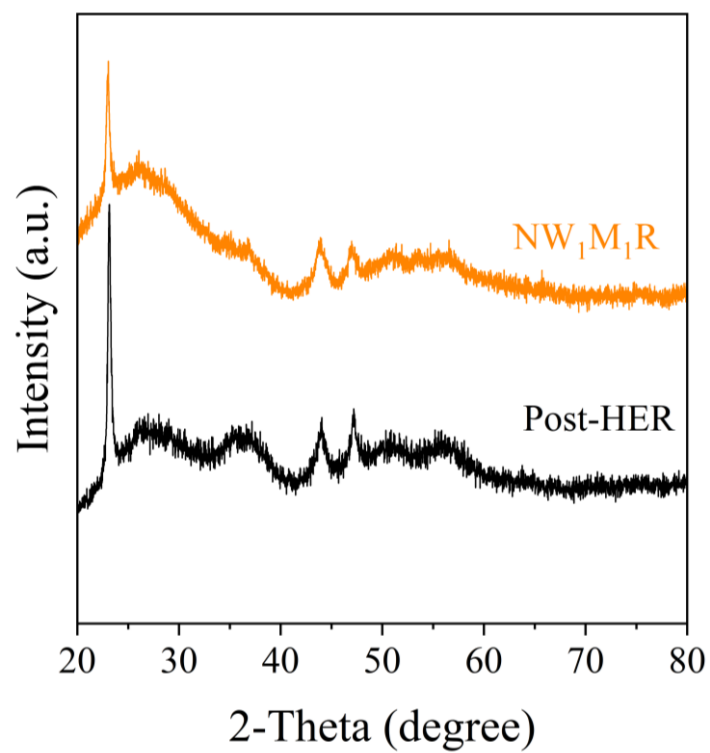

**Figure R23.** XRD patterns of NW<sub>1</sub>M<sub>1</sub>R and Post- HER.



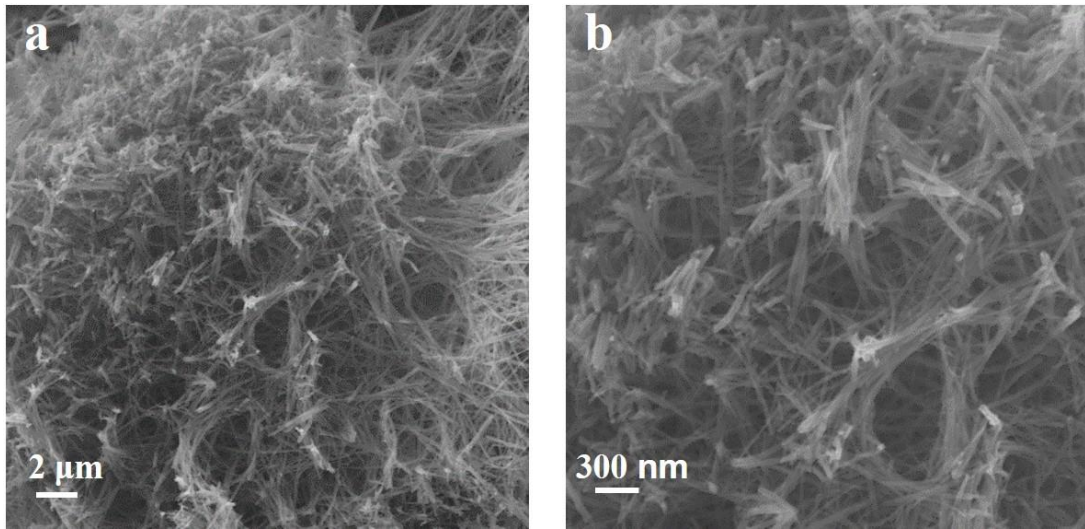

**Figure S24.** SEM image of NW<sub>1</sub>M<sub>1</sub>R after HER stabilization for 160 h at 1.0 M KOH.

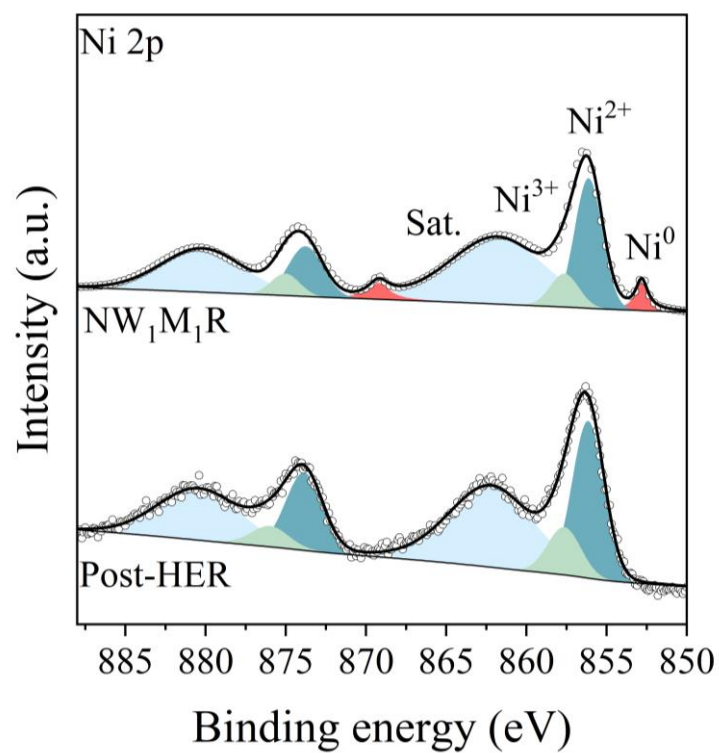

**Figure S25.** High-resolution XPS signals of Ni 2p for NW<sub>1</sub>M<sub>1</sub>R and Post- HER.

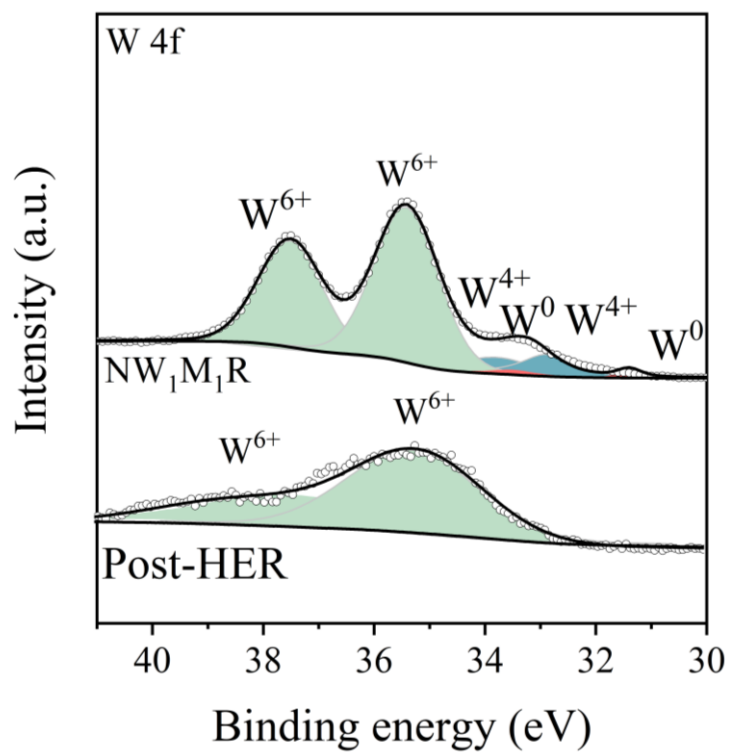

**Figure S26.** High-resolution XPS signals of W 4f for NW<sub>1</sub>M<sub>1</sub>R and Post- HER.

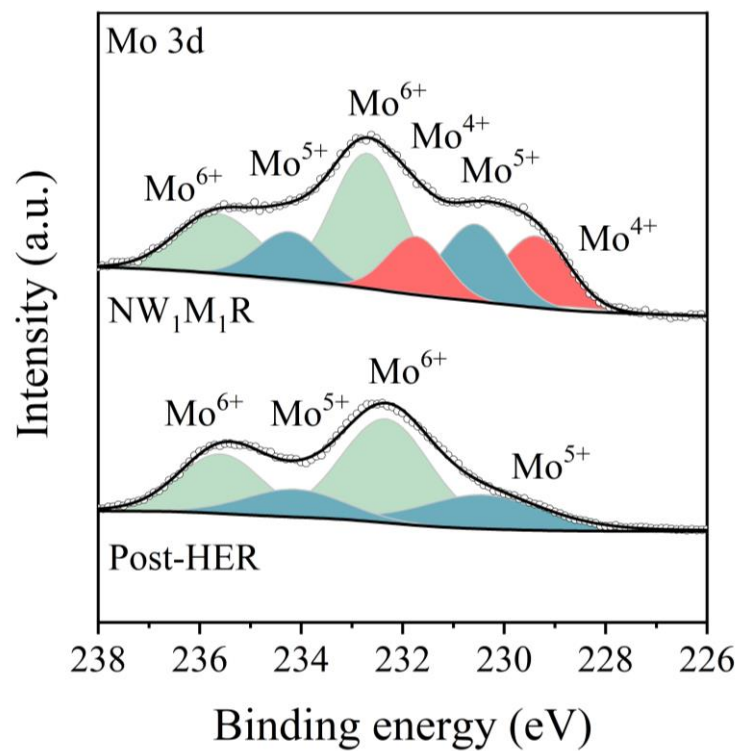

**Figure S27.** High-resolution XPS signals of Mo 3d for NW<sub>1</sub>M<sub>1</sub>R and Post- HER.

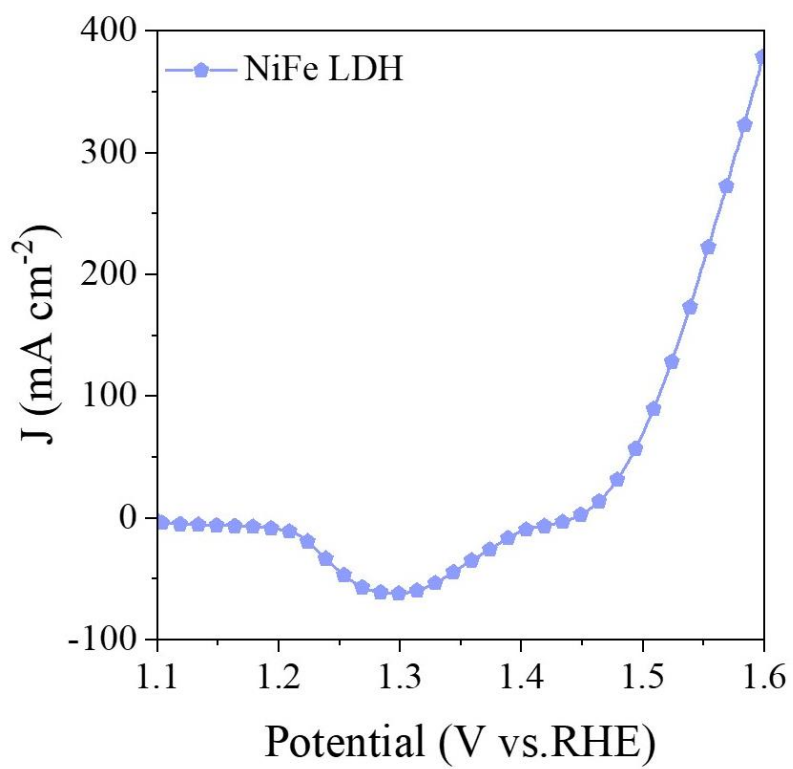

**Figure S28.** LSV curves of home-made NiFe LDH in 1.0 M KOH.

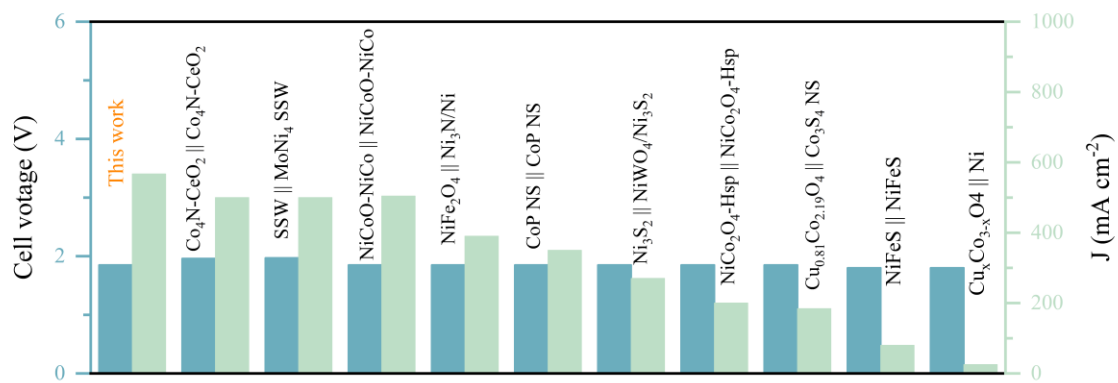

**Figure S29.** AEM performance comparison with NW<sub>1</sub>M<sub>1</sub>R and recently reported electrocatalyst.

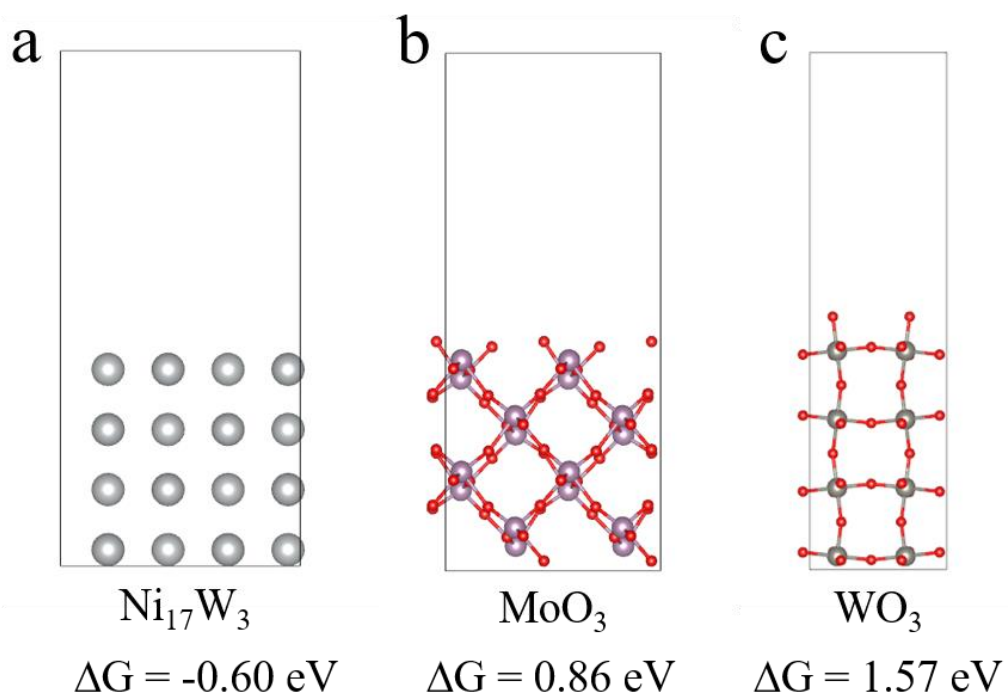

**Figure S30.**  $\Delta G$  of  $\text{Ni}_{17}\text{W}_3$ ,  $\text{MoO}_3$  and  $\text{WO}_3$ .

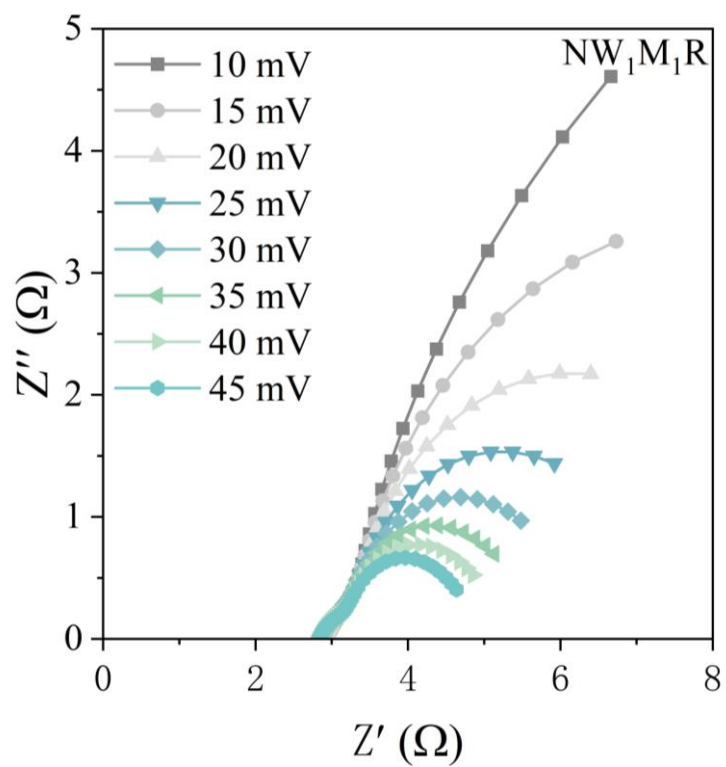

**Figure S31.** Nyquist plots of NW<sub>1</sub>M<sub>1</sub>R in 1.0 M KOH at various HER overpotentials.



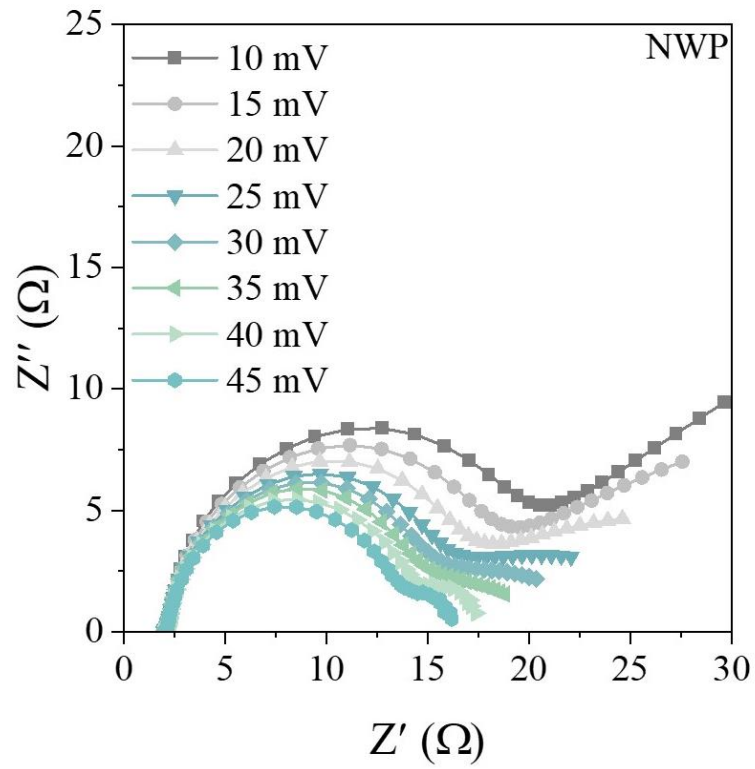

**Figure S32.** Nyquist plots of NWP in 1.0 M KOH at various HER overpotentials.

**Table S1.** Comparisons of the HER catalytic activity of hierarchical NW<sub>1</sub>M<sub>1</sub>R electrode in 1.0 M KOH electrolyte with representative electrocatalysts reported previously.

| Electrocatalyst                                                                      | Overpotentials (mV) at 10 mA cm <sup>-2</sup> | Tafel slope (mV dec <sup>-1</sup> ) | Reference                                                |
|--------------------------------------------------------------------------------------|-----------------------------------------------|-------------------------------------|----------------------------------------------------------|
| <b>NW<sub>1</sub>M<sub>1</sub>R</b>                                                  | <b>16</b>                                     | <b>34.9</b>                         | <b>This work</b>                                         |
| WC-N/W                                                                               | 87                                            | 44.9                                | <i>Adv. Sci.</i> <b>2022</b> , 9, 2106                   |
| NiMo/Co(OH) <sub>2</sub> @CC                                                         | 30                                            | 41                                  | <i>Adv. Funct. Mater.</i> <b>2021</b> , 31, 2102117      |
| NiMo/Ni-P                                                                            | 32                                            | 60.85                               | <i>Nat. Commun.</i> <b>2018</b> , 9, 2014                |
| MoO <sub>3</sub> /Ni-NiO                                                             | 62                                            | 59                                  | <i>Adv. Mater.</i> <b>2020</b> , 32, 2003414             |
| β-NiMoO <sub>4</sub>                                                                 | 23                                            | 44                                  | <i>Nat. Commun.</i> <b>2021</b> , 12, 5960.              |
| NiMoO <sub>x</sub> /NiMoS                                                            | 38                                            | 38                                  | <i>Nat. Commun.</i> <b>2020</b> , 11, 5462               |
| MoS <sub>2</sub> /Co <sub>9</sub> S <sub>8</sub> /Ni <sub>3</sub> S <sub>2</sub> /Ni | 113                                           | 85                                  | <i>J. Am. Chem. Soc.</i> <b>2019</b> , 141, 10417        |
| IrMo <sub>0.59</sub> NPs                                                             | 23                                            | 50                                  | <i>Adv. Mater.</i> <b>2020</b> , 32, 2006034.            |
| DS IrNi@CNTS                                                                         | 17                                            | 48                                  | <i>ACS Catal.</i> <b>2020</b> , 10, 7322-7327            |
| Co/MoN                                                                               | 52                                            | 77.5                                | <i>Appl. Catal. B</i> <b>2021</b> , 286, 119882          |
| Ni <sub>2</sub> P/MoS <sub>2</sub>                                                   | 149                                           | 60.2                                | <i>Adv. Funct. Mater.</i> <b>2019</b> , 29, 1809151      |
| Ni <sub>3</sub> N-NiMoN                                                              | 31                                            | 64                                  | <i>Nano Energy</i> <b>2018</b> , 44, 353-363             |
| FeP/Ti                                                                               | 97                                            | 64                                  | <i>Appl. Catal. B</i> <b>2020</b> , 260, 118156          |
| P-MoP/Mo <sub>2</sub> N                                                              | 89                                            | 78                                  | <i>Angew. Chem. Int. Ed.</i> <b>2021</b> , 60, 6673-6681 |

**Table S2.** The fitted parameters of the EIS data of NWP catalysts for HER.

| Catalyst | $\eta$ (mV) | $R_s$ ( $\Omega$ ) | $CPE_{1-T}$ | $CPE_{1-P}$ | $R_1$ ( $\Omega$ ) | $CPE_{2-T}$ | $CPE_{2-P}$ | $R_2$ ( $\Omega$ ) |
|----------|-------------|--------------------|-------------|-------------|--------------------|-------------|-------------|--------------------|
|          | 10          | 2.046              | 0.008685    | 0.89501     | 19.22              | 0.37296     | 0.72155     | 32.77              |
|          | 15          | 2.056              | 0.008624    | 0.89624     | 17.64              | 0.48110     | 0.76287     | 18.50              |
|          | 20          | 2.069              | 0.008486    | 0.89514     | 16.25              | 0.60179     | 0.80656     | 11.04              |
| NWP      | 25          | 2.059              | 0.008393    | 0.89588     | 15.04              | 0.73284     | 0.85480     | 7.063              |
|          | 30          | 2.068              | 0.008333    | 0.89522     | 14.23              | 0.85369     | 0.89342     | 5.069              |
|          | 35          | 2.073              | 0.008211    | 0.89666     | 13.61              | 1.11300     | 0.98337     | 3.452              |
|          | 40          | 2.059              | 0.008294    | 0.89383     | 12.84              | 1.31100     | 0.98950     | 2.657              |
|          | 45          | 2.060              | 0.008199    | 0.89546     | 12.05              | 1.4480      | 0.99870     | 2.153              |

**Table S3.** The fitted parameters of the EIS data of NW<sub>1</sub>M<sub>1</sub>R catalysts for HER.

| Catalyst                         | $\eta$ (mV) | $R_s$ ( $\Omega$ ) | CPE <sub>1-T</sub> | CPE <sub>1-P</sub> | $R_1$ ( $\Omega$ ) | CPE <sub>2-T</sub> | CPE <sub>2-P</sub> | $R_2$ ( $\Omega$ ) |
|----------------------------------|-------------|--------------------|--------------------|--------------------|--------------------|--------------------|--------------------|--------------------|
|                                  | 10          | 3.035              | 0.74778            | 0.83254            | 1.163              | 0.7300             | 0.82853            | 14.22              |
|                                  | 15          | 3.021              | 0.74539            | 0.84010            | 1.078              | 0.8764             | 0.85580            | 7.568              |
|                                  | 20          | 3.039              | 0.83357            | 0.86548            | 1.218              | 1.1190             | 0.89389            | 4.336              |
| NW <sub>1</sub> M <sub>1</sub> R | 25          | 3.022              | 0.80187            | 0.85017            | 1.068              | 1.2940             | 0.90824            | 2.957              |
|                                  | 30          | 3.000              | 0.76032            | 0.86896            | 0.895              | 1.4260             | 0.90796            | 2.208              |
|                                  | 35          | 2.998              | 0.77300            | 0.85863            | 0.834              | 1.6610             | 0.91558            | 1.662              |
|                                  | 40          | 2.991              | 0.76607            | 0.86803            | 0.793              | 1.8250             | 0.92734            | 1.311              |
|                                  | 45          | 2.982              | 0.75020            | 0.85792            | 0.706              | 1.9600             | 0.92208            | 1.111              |
